# Supplementary material for: Three cobalt-based coordination polymers with tripodal carboxylate and imidazole-containing ligands: syntheses, structures, properties and DFT studies
Source: Royal Society of Chemistry journal article supplement (doi:10.1039/c9ra07737e), 2019-01-01
Supplement: c9ra07737e1.pdf [file c9ra07737e1.pdf]

**Three Cobalt-Based Coordination Polymers with Tripodal Carboxylate  
and Imidazole-containing Ligands: Syntheses, Structures, Properties  
and DFT studies**

**Long Tang<sup>\*</sup>, Yu-Hao Fu, Huan-Huan Wang, Yi-Tong Wang, JiJiang Wang<sup>\*</sup>, XiangYang Hou,**

**Supplementary Information**

**Table S1** Selected bond lengths (Å) and angles (°) for compounds **1-3**

| Bond lengths and angles | Experiment | Bond lengths and angles | Experiment | Bond lengths and angles | Experiment |
|-------------------------|------------|-------------------------|------------|-------------------------|------------|
| <b>1</b>                |            | <b>2</b>                |            | <b>3</b>                |            |
| Co(1)-O(6)#1            | 2.0104(18) | Co(1)-O(3)#1            | 2.0394(19) | Co(1)-O(1)              | 1.973(2)   |
| Co(1)-O(5)#2            | 2.0430(17) | Co(1)-O(4)#2            | 2.0639(18) | Co(1)-O(3)#1            | 2.009(2)   |
| Co(1)-N(4)              | 2.097(2)   | Co(1)-N(1)              | 2.128(2)   | Co(1)-N(4)              | 2.037(3)   |
| Co(1)-N(7)#3            | 2.150(2)   | Co(1)-N(4)#3            | 2.135(2)   | Co(1)-N(7)#2            | 2.040(3)   |
| Co(1)-O(1)              | 2.1739(18) | Co(1)-O(1)              | 2.1573(19) |                         |            |
| Co(1)-O(2)              | 2.2269(17) | Co(1)-O(2)              | 2.2578(19) |                         |            |
| O(6)#1-Co(1)-O(5)#2     | 115.23(7)  | O(3)#1-Co(1)-O(4)#2     | 117.76(7)  | O(1)-Co(1)-O(3)#1       | 119.27(11) |
| O(6)#1-Co(1)-N(4)       | 93.07(9)   | O(3)#1-Co(1)-N(1)       | 87.48(9)   | O(1)-Co(1)-N(4)         | 110.06(10) |
| O(5)#2-Co(1)-N(4)       | 91.25(8)   | O(4)#2-Co(1)-N(1)       | 87.23(8)   | O(3)#1-Co(1)-N(4)       | 106.71(11) |
| O(6)#1-Co(1)-N(7)#3     | 89.16(9)   | O(3)#1-Co(1)-N(4)#3     | 91.51(9)   | O(1)-Co(1)-N(7)#2       | 104.02(10) |
| O(5)#2-Co(1)-N(7)#3     | 87.29(8)   | O(4)#2-Co(1)-N(4)#3     | 91.98(8)   | O(3)#1-Co(1)-N(7)#2     | 92.61(11)  |
| N(4)-Co(1)-N(7)#3       | 177.70(8)  | N(1)-Co(1)-N(4)#3       | 178.24(8)  | N(4)-Co(1)-N(7)#2       | 124.21(11) |
| O(6)#1-Co(1)-O(1)       | 91.72(7)   | O(3)#1-Co(1)-O(1)       | 148.71(8)  |                         |            |
| O(5)#2-Co(1)-O(1)       | 152.73(7)  | O(4)#2-Co(1)-O(1)       | 93.23(7)   |                         |            |
| N(4)-Co(1)-O(1)         | 91.39(8)   | N(1)-Co(1)-O(1)         | 89.96(8)   |                         |            |
| N(7)#3-Co(1)-O(1)       | 89.09(8)   | N(4)#3-Co(1)-O(1)       | 91.65(8)   |                         |            |
| O(6)#1-Co(1)-O(2)       | 151.09(7)  | O(3)#1-Co(1)-O(2)       | 89.80(7)   |                         |            |
| O(5)#2-Co(1)-O(2)       | 93.67(7)   | O(4)#2-Co(1)-O(2)       | 152.42(7)  |                         |            |
| N(4)-Co(1)-O(2)         | 86.66(8)   | N(1)-Co(1)-O(2)         | 93.29(8)   |                         |            |
| N(7)#3-Co(1)-O(2)       | 91.65(8)   | N(4)#3-Co(1)-O(2)       | 88.14(8)   |                         |            |
| O(1)-Co(1)-O(2)         | 59.41(6)   | O(1)-Co(1)-O(2)         | 59.20(7)   |                         |            |

Symmetry transformations used to generate equivalent atoms: **1**: #1 -x+1, -y+1, -z+1, #2 x, y, z-1, #3 -x+1, -y+1, -z;

**2**: #1 -x-1, -y+1, -z+2, #2 x, y+1, z-1, #3 x-1, y, z+1; **3**: #1 x+1, y, z+1, #2 x-1, y-1, z.

**Table S2** Hydrogen bond lengths (Å) and bond angles deg for **1** and **3**

| D-H...A       | d(H...A)/Å | d(D...A)/Å | <DHA deg |
|---------------|------------|------------|----------|
| <b>1</b>      |            |            |          |
| O3-H3A...O4#5 | 1.79       | 2.6478(18) | 176.95   |
| <b>3</b>      |            |            |          |
| O5-H5...O2#5  | 1.73       | 2.592(3)   | 158.3    |

Symmetry code for **1**: #5 -x -2, -y + 2, -z + 1; for **3**: #5 x-1, y - 1, z.

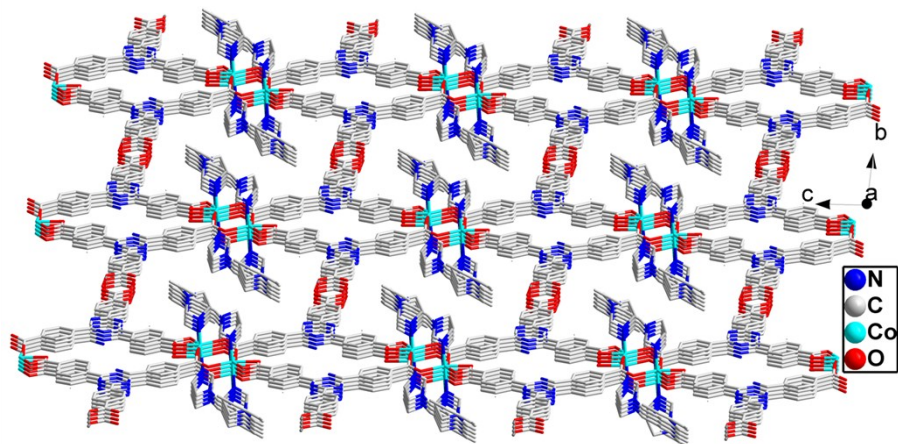

**Figure S1** The 3D supramolecular structure of **1**

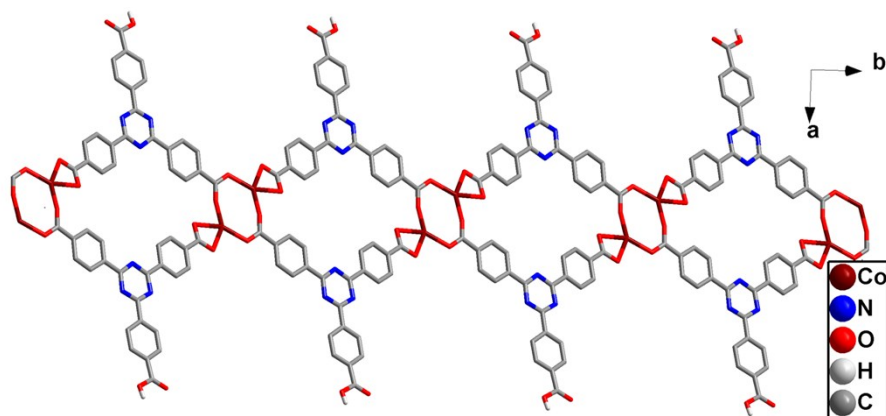

**Figure S2** The 1D double-strand chain of **2** view along  $[010]$  direction

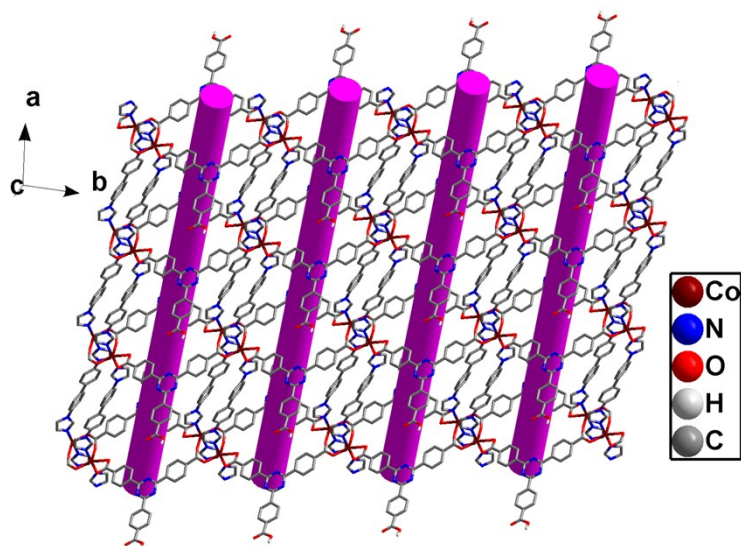

**Figure S3** The 2D layer structure of **2**

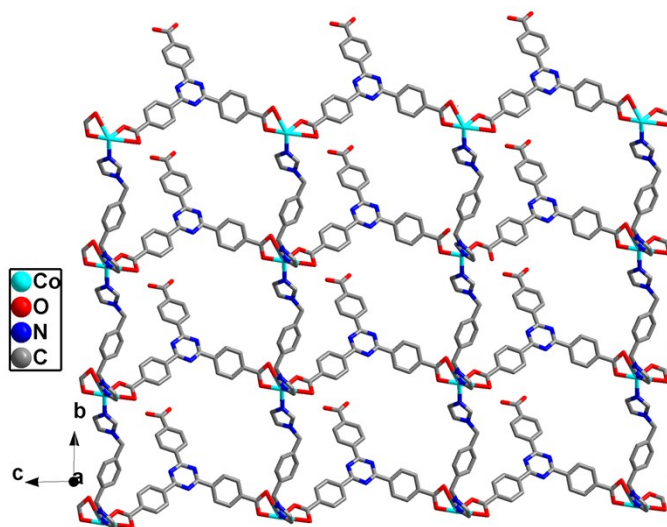

**Figure S4** The 2D layer structure of **3**

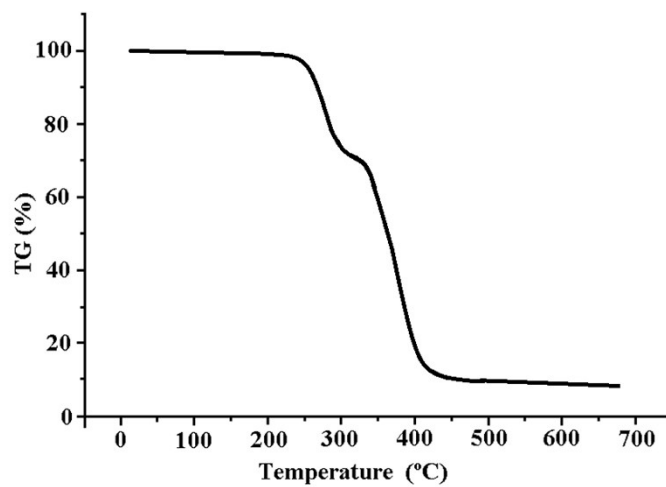

**Figure S5** TG curve of compound **1**

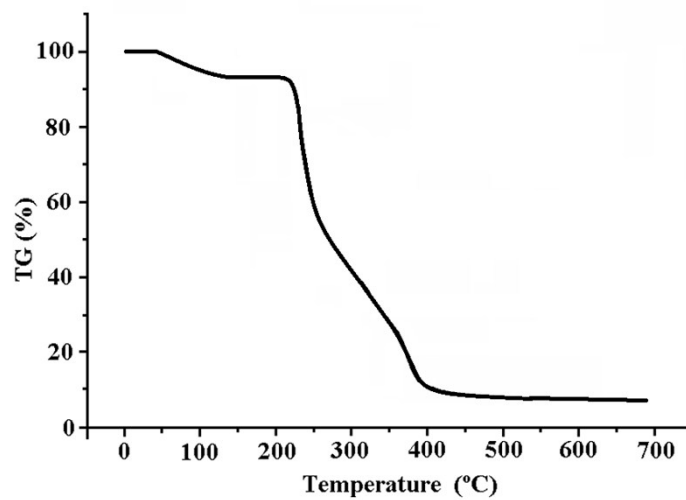

**Figure S6** TG curve of compound **2**

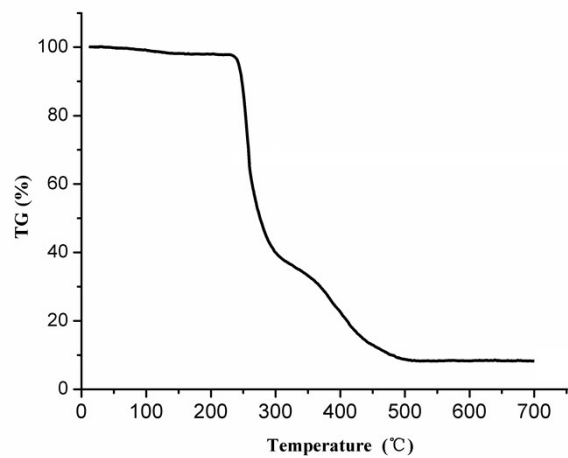

**Figure S7** TG curve of compound **3**
